# Supplementary material
Source: publisher figshare collection journal article supplement (https://karger.figshare.com/ndownloader/files/26202164)
Supplement: Supplementary file 1 [file 26202164]

**Supplementary Table 5. Multivariable Multinomial Logistic Regression of Multiple Symptoms stratified by sex- Dependent Variable: Frailty (ORs, 95% CI)**

| **Number of symptoms** | **Men§** | | **Women§** | |
| --- | --- | --- | --- | --- |
| **Pre-frail** | **Frail** | **Pre-frail** | **Frail** |
| All symptoms |  |  |  |  |
| 0 | Ref (1) | Ref (1) | Ref (1) | Ref (1) |
| 1 | 1.46(0.71-3.02) | 1.04(0.21-5.17) | 0.82(0.43-1.58) | 1.98(0.60-6.55) |
| 2-5 | 0.99(0.73-1.34) | 1.14(0.59-2.22) | 0.96(0.74-1.26) | 0.87(0.46-1.67) |
| >5 | 1.16(0.89-1.50) | 2.15(1.31-3.52)** | 1.06(0.86-1.30) | 1.49(0.95-2.34) |
| MS |  |  |  |  |
| 0 | Ref (1) | Ref (1) | Ref (1) | Ref (1) |
| 1 | 0.99(0.65-1.50) | 1.37(0.59-3.19) | 1.01(0.71-1.45) | 1.01(0.45-2.28) |
| >=2 | 1.11(0.76-1.62) | 2.24(1.08-4.65)* | 1.13(0.81-1.58) | 1.94(0.94-4.00) |
| NR |  |  |  |  |
| 0 | Ref (1) | Ref (1) | Ref (1) | Ref (1) |
| 1 | 0.95(0.63-1,42) | 0.95(0.44-2.02) | 0.82(0.57-1.18) | 0.70(0.32-1.51) |
| >=2 | 1.31(0.86-2.00) | 0.89(0.40-2.00) | 0.81(0.57-1.15) | 0.68(0.33-1.42) |
| GI |  |  |  |  |
| 0 | Ref (1) | Ref (1) | Ref (1) | Ref (1) |
| 1 | 0.60(0.41-0.88)** | 0.69(0.34-1.39) | 1.02(0.75-1.41) | 0.68(0.35-1.31) |
| >=2 | 0.79(0.47-1.34) | 0.70(0.28-1.72) | 1.14(0.77-1.68) | 0.82(0.39-1.74) |
| CP |  |  |  |  |
| 0 | Ref (1) | Ref (1) | Ref (1) | Ref (1) |
| 1 | 0.91(0.61-1.36) | 0.48(0.20-1.19) | 1.29(0.91-1.81) | 1.86(0.87-3.97) |
| >=2 | 1.21(0.79-1.87) | 1.53(0.70-3.34) | 1.35(0.96-1.90) | 2.66(1.32-5.36)** |
| OS |  |  |  |  |
| 0 | Ref (1) | Ref (1) | Ref (1) | Ref (1) |
| 1 | 1.24(0.81-1.89) | 1.30(0.57-2.97) | 0.78(0.55-1.11) | 0.43(0.20-0.92)* |
| >=2 | 1.22(0.79-1.87) | 1.68(0.76-3.68) | 1.13(0.81-1.58) | 0.78(0.38-1.58) |

*<0.05, **<0.01, ***<0.001

§logistic regression; Adjusted for all covariates, MS, NR, GI, CP, OS (in logistic regression analysis of all symptoms, we did not adjust for multiple symptoms of each organ system)

MS: Musculoskeletal symptoms (including 3 symptoms); NR: Neurological symptoms (including 4 symptoms); GI: Gastrointestinal symptoms (including 3 symptoms); CP: Cardiopulmonary symptoms (including 6 symptoms); OS: Other symptoms (including 5 symptoms)
